# Supplementary material for: Nanoparticle dynamics in macrophages investigated with a laboratory soft x-ray microscope
Source: Research Square preprint supplement (doi:10.21203/rs.3.rs-6933175/v1), 2025-07-22
Supplement: Supplementary file 1 [file 4090938dd45cb05b9b0b0326.pdf]

## 2 **Supplementary Materials for**

### 3 **Nanoparticle dynamics in macrophages investigated with a laboratory soft x-ray microscope**

4 **Komang G. Y. Arsana, Giovanni M. Saladino, Bertha Brodin, Muhammet S. Toprak, and Hans M. Hertz**

5 **Komang G. Y. Arsana.**

6 **E-mail: [arsana@kth.se](mailto:arsana@kth.se)**

7 **This PDF file includes:**

8 Figs. S1 to S4

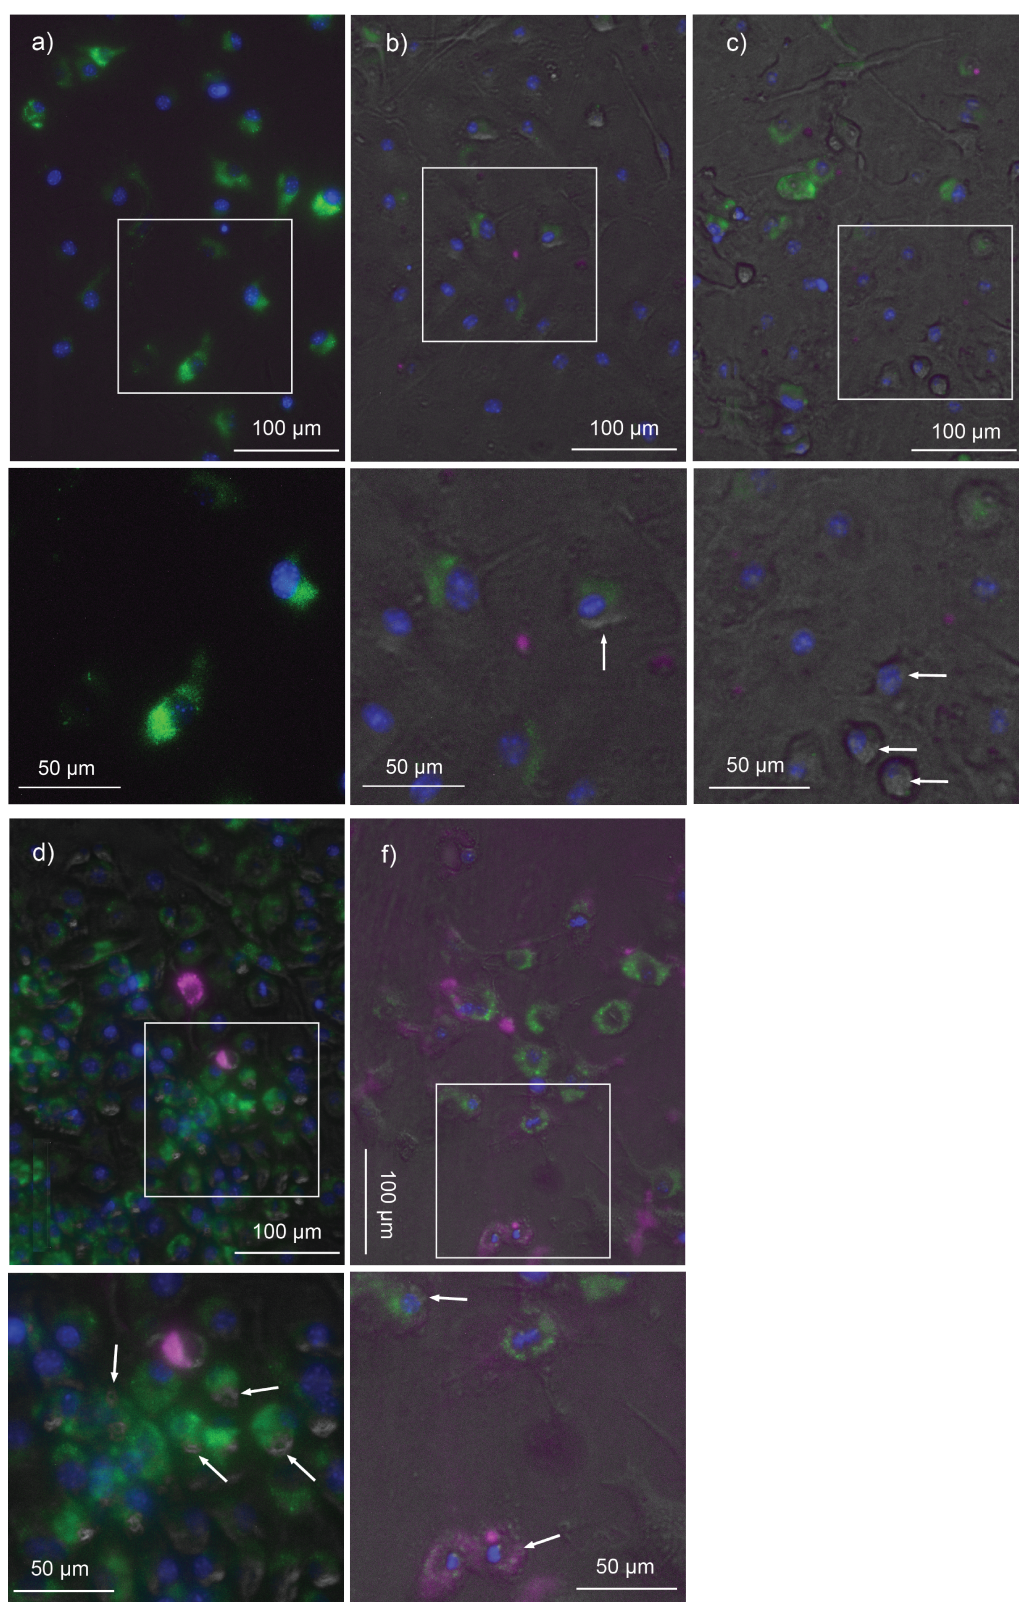

**Fig. S1.** Live fluorescence microscopy images of macrophages exposed to MoO<sub>2</sub>-SiO<sub>2</sub> NPs at five different time points. Acidic compartments (lysosomes), nuclei, and MoO<sub>2</sub>-SiO<sub>2</sub> NPs are visualized in green, blue, and magenta, respectively. **a)** Unexposed (control) cells show the normal lysosomal load in the absence of MoO<sub>2</sub>-SiO<sub>2</sub> NP exposure. **b)** Macrophages exposed to MoO<sub>2</sub>-SiO<sub>2</sub> NPs for 1 hour. At this time point, the NPs begin to be internalized by the macrophages, as shown by red color in the image (see magnified image of in **b**). Additionally, the white structure (overlapping green and magenta, indicated by an arrow) shows that MoO<sub>2</sub>-SiO<sub>2</sub> NPs are co-localized with the lysosomes. **c)** Macrophages exposed to MoO<sub>2</sub>-SiO<sub>2</sub> NPs for 2 hours. More MoO<sub>2</sub>-SiO<sub>2</sub> NPs are found inside the lysosomes, and these structures are also marked by arrows in the image. **d)** Macrophages exposed to MoO<sub>2</sub>-SiO<sub>2</sub> NPs for 4 hours. The white structures become more prominent at this time point, with ring-like structures also observed. **e)** Macrophages exposed to MoO<sub>2</sub>-SiO<sub>2</sub> NPs for 24 hours.



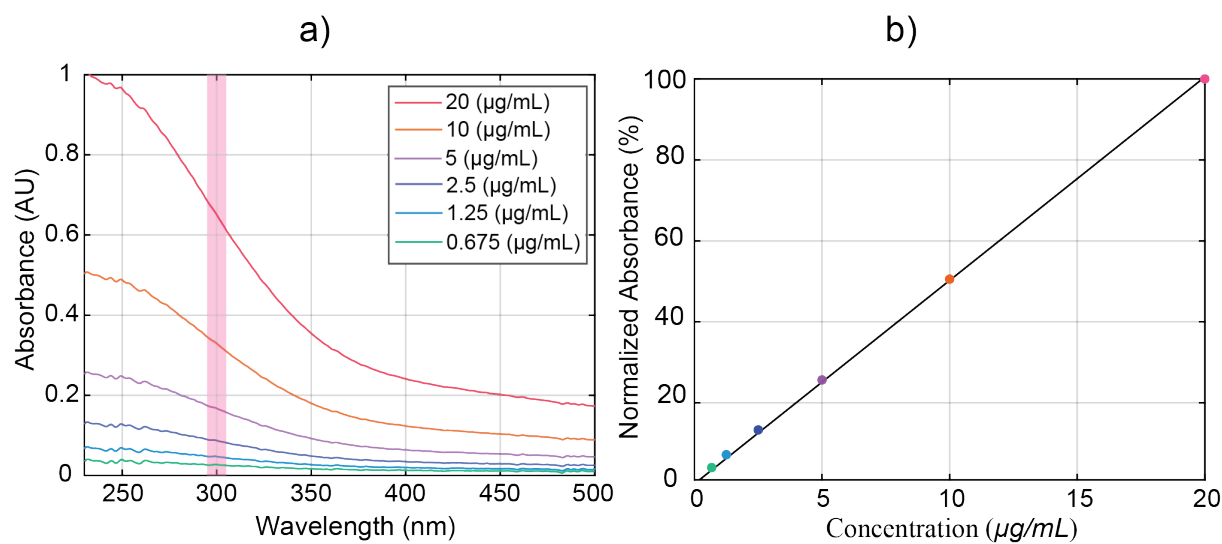

**Fig. S2.** **a)** Ultraviolet-visible (UV-Vis) spectra of six different concentrations of  $\text{MoO}_2\text{-SiO}_2$  in DI water. **b)** Normalized absorbance values of the UV-Vis spectra for six different concentrations of  $\text{MoO}_2\text{-SiO}_2$  at a wavelength range of 290-310 nm. The experiments were conducted at 37°C

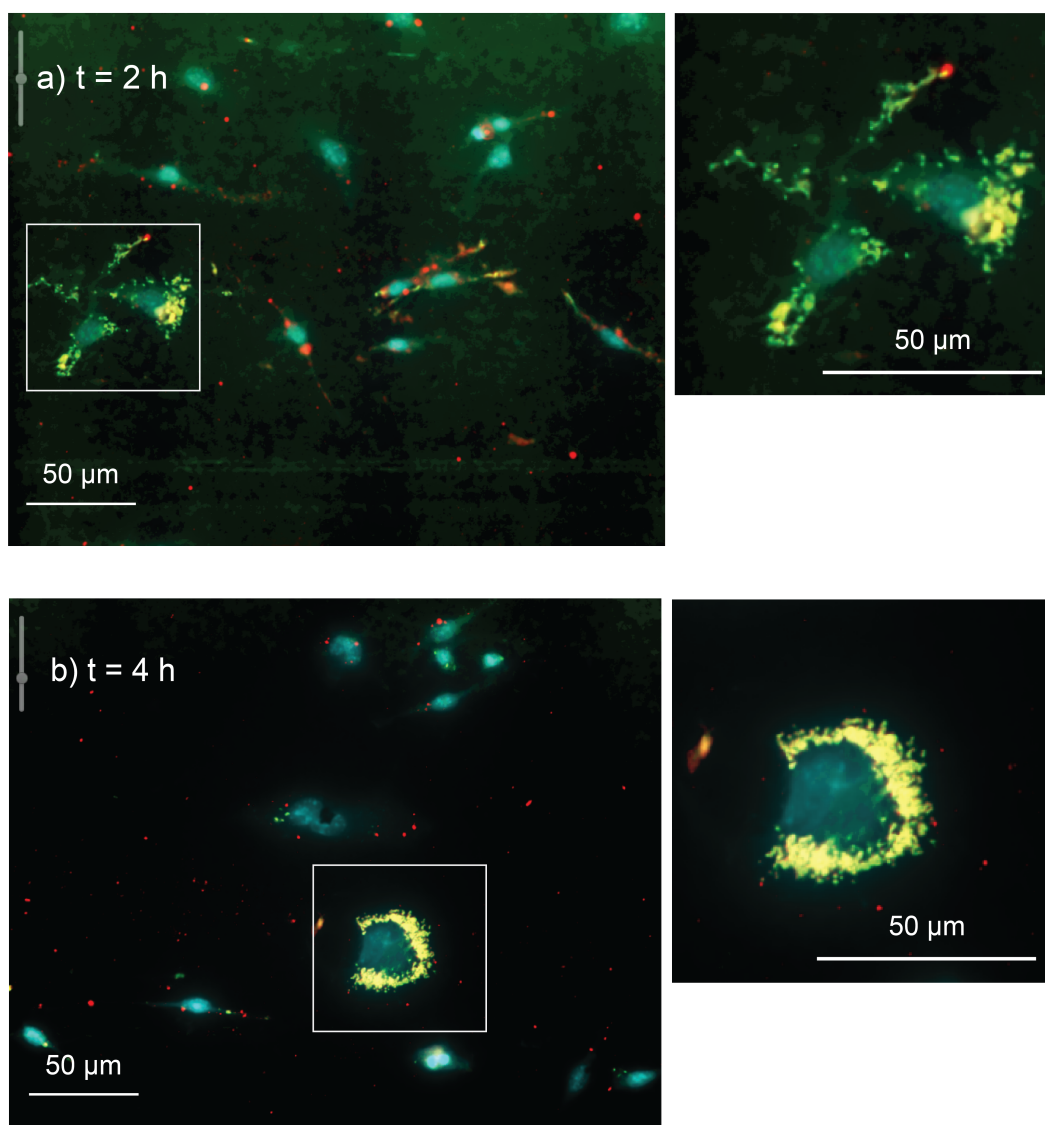

**Fig. S3.** Confocal microscopy images of macrophages exposed to MoO<sub>2</sub>-SiO<sub>2</sub> nanoparticles (NPs) at different time points. The cells were stained with LC3B antibody to demonstrated autophagy in the samples. The LC3B antibody, nuclei, and MoO<sub>2</sub>-SiO<sub>2</sub> NPs are visualized in yellow, blue, and red, respectively. Macrophages exposed to MoO<sub>2</sub>-SiO<sub>2</sub> NPs for 2 hours and 4 hours are shown in **a)** and **b)**, respectively. The presence of LC3B antibody, indicated by yellow structures in both **a)** and **b)**, suggests that autophagy is occurring in the cells during these time points. However, this autophagy activity is observed only in some cells, indicating that phagocytosis is likely the primary pathway for NP uptake.

Figure S4 shows confocal microscopy images of macrophages undergoing autophagy. The samples were prepared by seeding murine liver macrophages (Sigma-Aldrich, Stockholm, Sweden) in chamber slides (Millipore, MA, USA) and allowing them to attach to the surface for 24 hours. Following this, MoO<sub>2</sub>-SiO<sub>2</sub> NPs were added to the cells at a concentration of 100 μg/mL, and the cells were incubated in the presence of the NPs for for 2 hours and 4 hours. At the end of the incubation period, the medium contain NPs was removed, and the slides were washed three times with PBS. The cells were then fixed with 4% paraformaldehyde (PFA) for 15 minutes, followed by permeabilization with 0.1% Triton X-100 for 30 minutes. After permeabilization, the cells were blocked with 3% BSA and incubated with Alexa Fluor 488-conjugated LC3B antibody (Millipore, MA, USA) for 2 hours. After the incubation, unbound antibody was removed by washing the slides three times with PBS. Finally, the slides were mounted using ProLong<sup>TM</sup> anti-fade mounting medium (Invitrogen, Thermo Fisher Scientific, Waltham, MA, USA) before imaging.

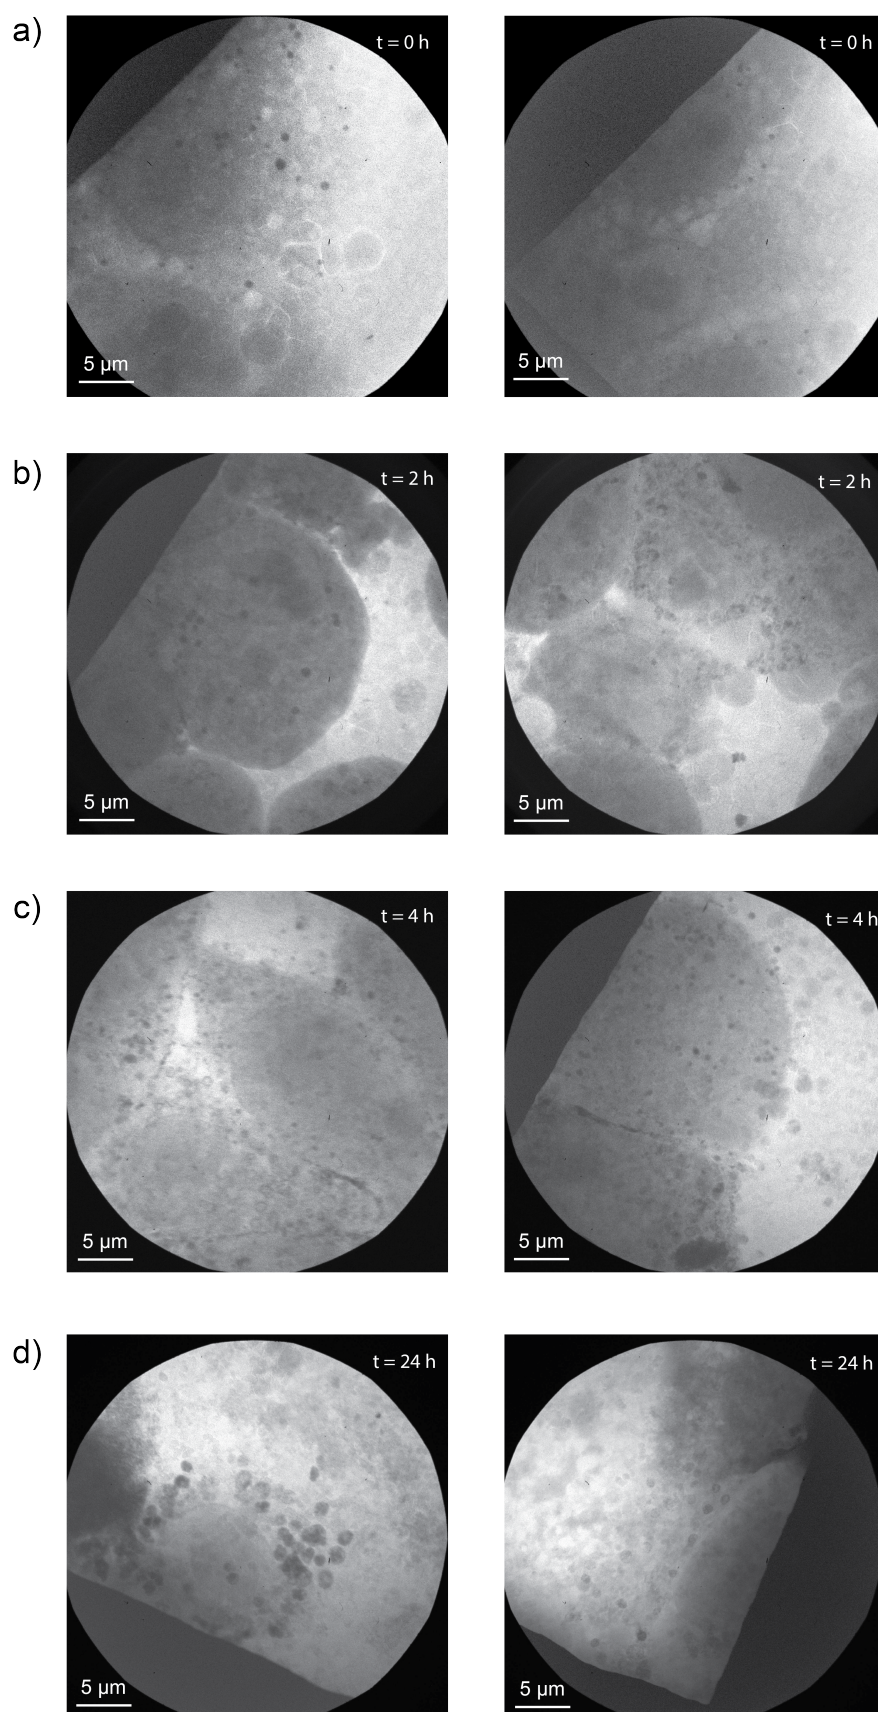

**Fig. S4.** X-ray micrographs of macrophages exposed to  $\text{MoO}_2\text{-SiO}_2$  NPs at four different time points. **a)** Control cells (cells were not exposed to  $\text{MoO}_2\text{-SiO}_2$  NPs). **b-d)** Macrophages were exposed to NPs for 2, 4, and 24 hours, respectively. The images show the progression of NP uptake over time, with clear evidence of NP distribution within the macrophages. Figure 2d (right) illustrates that some cells appear to have burst after 24 hours of exposure.
